# Supplementary material for: Enhanced electrochemical reactions of 1,4-benzoquinone at nanoporous electrodes
Source: Royal Society of Chemistry journal article supplement (doi:10.1039/c3cp50175b), 2013-01-01
Supplement: c3cp50175b.pdf [file c3cp50175b.pdf]

# Supporting information

## **Enhanced electrochemical reactions of 1,4-benzoquinone at nanoporous electrodes**

**Je Hyun Bae, Yang-Rae Kim, R. Soyoung Kim and Taek Dong Chung\***

Department of Chemistry, Seoul National University, Seoul 151-747, Korea

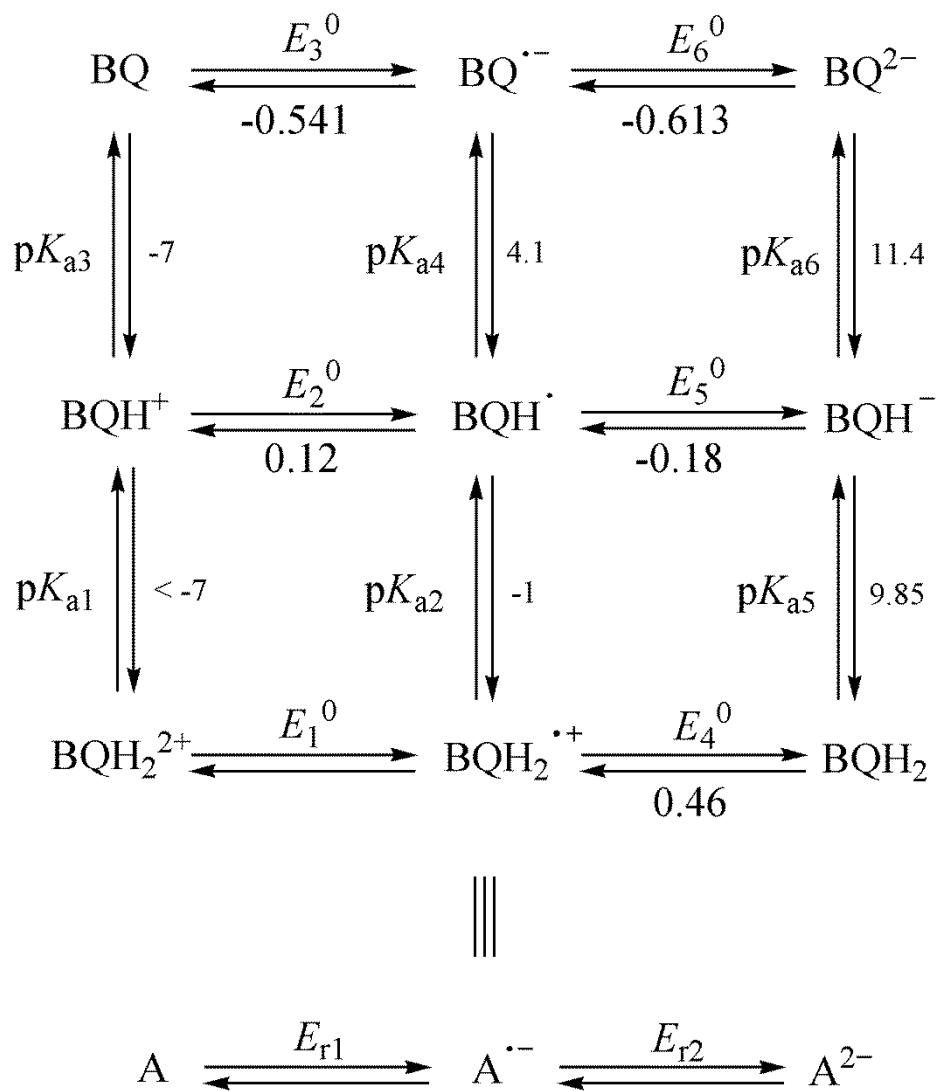

**Scheme S1** Laviron's analysis using a nine-membered square scheme describing 1,4-benzoquinone (BQ) reduction in buffered aqueous solutions.<sup>1</sup> This description consists of two ladder schemes, which involve three different protonation states for each redox state represented by A, A<sup>·-</sup> and A<sup>2-</sup>. Each ladder scheme is shown to be equivalent to a simple one-electron reaction having apparent standard potentials  $E_{\text{r}1}$  and  $E_{\text{r}2}$  by assuming that proton transfer reactions are at full equilibrium. All potentials taken from the literature<sup>2</sup> are given relative to mercury sulfate electrode (+ 0.64 V vs. NHE).

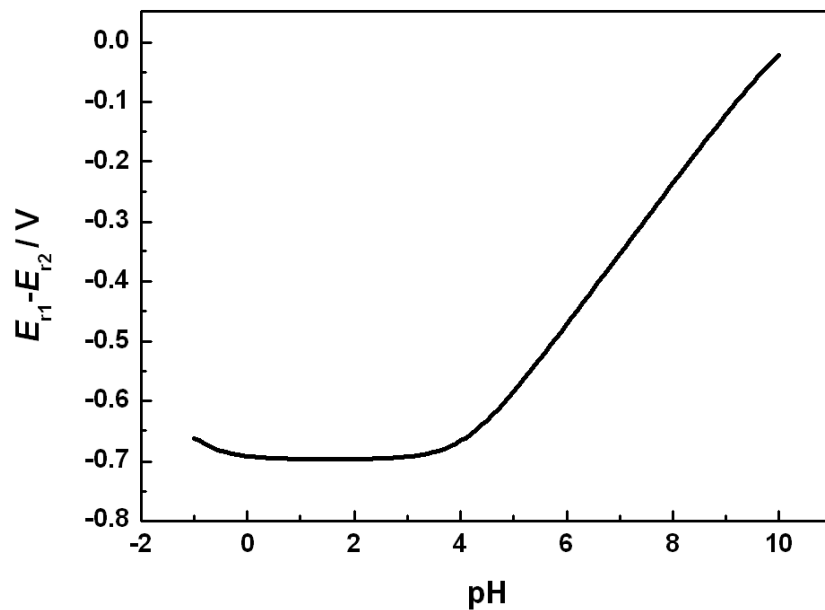

**Fig. S1**  $E_{r1} - E_{r2}$  as a function of the pH.  $E_{r1} - E_{r2}$  was calculated by eqns (S1) and (S2)<sup>1</sup> employing  $E^0$  and  $pK_a$  values given in Scheme S1.  $pK_{a1} = -7$ .

$$E_{r1} = E_2^0 + \frac{RT}{F} \ln \left( \frac{\frac{K_{a4}}{[H^+]} + 1 + \frac{[H^+]}{K_{a2}}}{\frac{K_{a3}}{[H^+]} + 1 + \frac{[H^+]}{K_{a1}}} \right) \quad (\text{S1})$$

$$E_{r2} = E_5^0 + \frac{RT}{F} \ln \left( \frac{\frac{K_{a6}}{[H^+]} + 1 + \frac{[H^+]}{K_{a5}}}{\frac{K_{a4}}{[H^+]} + 1 + \frac{[H^+]}{K_{a2}}} \right) \quad (\text{S2})$$

### Simulation results of cyclic voltammograms for 5 mM BQ and BQH<sub>2</sub> in 1 M HClO<sub>4</sub> at 50 mV s<sup>-1</sup> using flat Pt and L<sub>2</sub>ePt

**Table S1.** Values for the standard potentials and electron and proton transfer rates for the simulation of BQ and BQH<sub>2</sub>

|           |                    | $E_{1\text{st step}}^0$<br>/ V vs. MSE | $E_{2\text{nd step}}^0$<br>/V vs. MSE | $k_{\text{ET}}$<br>/ cm s <sup>-1</sup> | $k_{\text{PT}}$ or $k_{\text{dPT}}$<br>/ M <sup>-1</sup> s <sup>-1</sup> |
|-----------|--------------------|----------------------------------------|---------------------------------------|-----------------------------------------|--------------------------------------------------------------------------|
| Reduction | Flat Pt            | $E_3^0 = -0.32$                        | $E_5^0 = 0.04$                        | 0.1                                     | $1 \times 10^7$                                                          |
|           | L <sub>2</sub> ePt |                                        |                                       | 10                                      | $1 \times 10^{10}$                                                       |
| Oxidation | Flat Pt            | $E_4^0 = 0.29$                         | $E_2^0 = -0.05$                       | 0.5                                     | $1 \times 10^7$                                                          |
|           | L <sub>2</sub> ePt |                                        |                                       | 10                                      | $1 \times 10^{10}$                                                       |

The reduction wave of BQ at a flat Pt was fitted based on ECEC mechanism. A variety of  $E^0$ ,  $k_{\text{ET}}$ , and  $k_{\text{PT}}$  values were tried to fit the voltammogram obtained at a flat Pt. All the other parameters including  $\text{p}K_{\text{a}}$  values and diffusion coefficients were used as described in the Experimental section. The fitting process started with values for  $E^0$ 's taken from the literature, which were carefully varied to find the best fit. Throughout the fitting process, the value of  $E_3^0 - E_5^0$  in the literature (see the Scheme S1), -360 mV, was kept constant since this value was critical enough to determine the shape of cyclic voltammograms. The  $k_{\text{ET}}$  value obtained, 0.1 cm s<sup>-1</sup>, was confirmed to be plausible referring to the EE simulation result (Fig. S2), and  $k_{\text{PT}}$  was tuned at a relatively low but reasonable value according to the literature.<sup>3</sup>

However,  $E^0$  values obtained from the fitting deviated from the literature values given by Laviron. We can find a clue to explain this by considering how the  $E^0$  values had been obtained by Laviron. In his theory, by assuming proton transfer reactions are fast enough to be at full equilibrium, the two-electron/two-proton transfer reaction was simplified as a two-electron transfer reaction with apparent standard potentials  $E_{\text{r1}}$  and  $E_{\text{r2}}$ . These apparent standard potentials were given by solution pH, individual  $E^0$ , and  $\text{p}K_{\text{a}}$  values in Laviron's scheme as seen in eqns

(S1) and (S2). The individual  $E^0$ 's were calculated from the  $E_{r1}$  and  $E_{r2}$  values that were experimentally determined.

In contrast to Laviron's frame, the rate of protonation and deprotonation reactions were not deduced but explicitly addressed in our simulation study. When kinetics is slow, the apparent peak potentials for a voltammogram will appear at more negative potential for reduction and more positive potential for oxidation for the same standard potential because more overpotential is required. Thus, we can suppose that if proton transfer reactions are not fast enough in reality, Laviron would have obtained more negative and positive  $E^0$ 's for reduction and oxidation, respectively, from the experimentally observed apparent standard potentials  $E_r$ 's. In fact, the  $E^0$ 's for reduction and oxidation obtained by fitting our voltammograms were more positive and negative than Laviron's  $E^0$ 's as explained by this scenario. Moreover, the smaller the proton transfer rate constants employed for fitting were, the larger was the magnitude of difference between Laviron's  $E^0$ 's and ours.

Similarly, the oxidation wave of BQH<sub>2</sub> was first fitted for the voltammogram at a flat Pt with ECEC mechanism by varying  $E^0$ ,  $k_{ET}$ , and  $k_{dPT}$ . For oxidation, the  $E^0$ 's corresponded to  $E_2^0$  and  $E_4^0$  in Scheme S1, and the condition  $E_2^0 - E_4^0 = 340$  mV was kept invaiable. The  $k_{ET}$  value obtained,  $0.5 \text{ cm s}^{-1}$ , was likewise checked by comparing with the EE simulation result (Fig. S2).

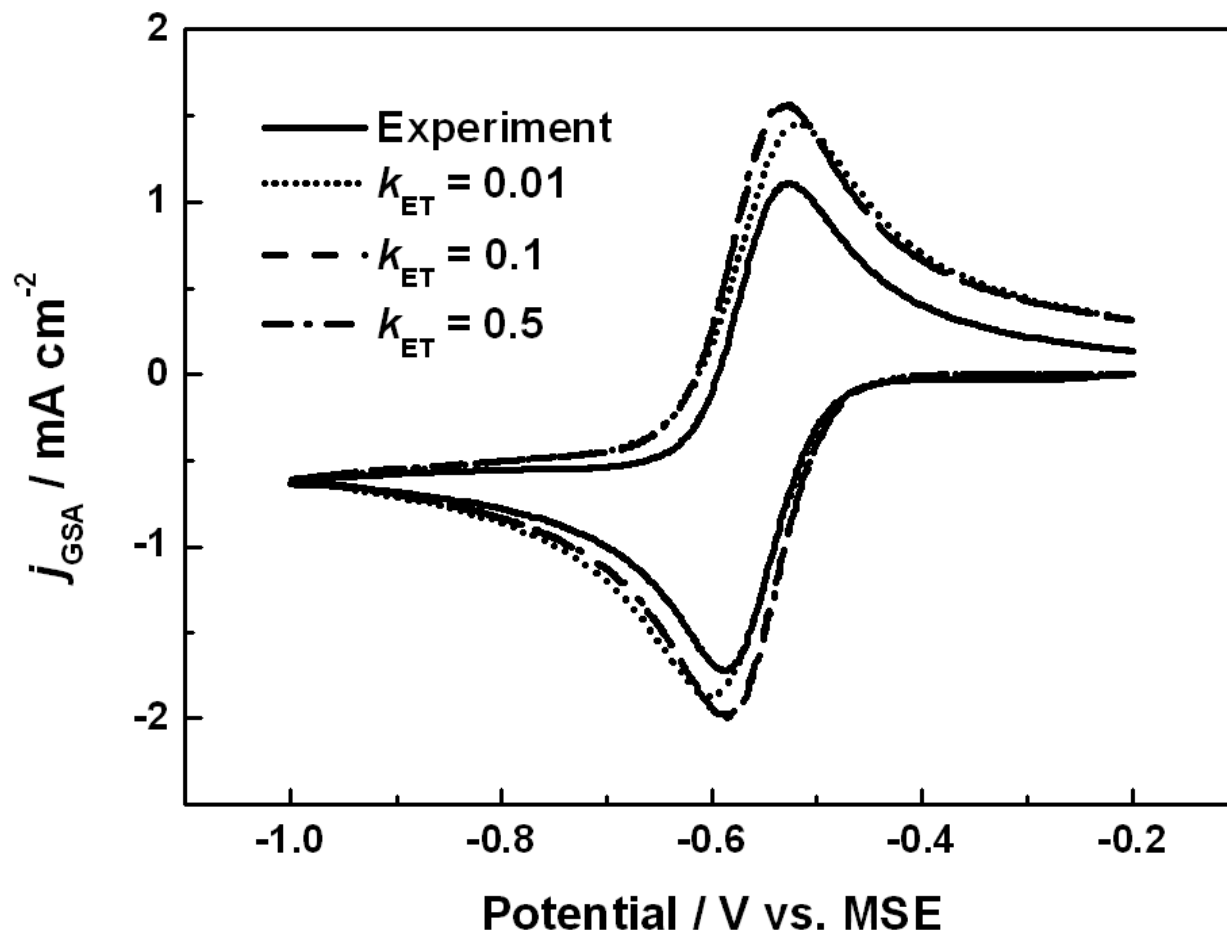

**Fig. S2** Cyclic voltammograms for 5 mM BQ in 1 M NaClO<sub>4</sub> at 50 mV s<sup>-1</sup>. The experimental data was fitted based on EE mechanism as a function of  $k_{\text{ET}}$ . The experimental cyclic voltammogram in 1 M NaClO<sub>4</sub> appeared to be nearly reversible electrochemical reaction. When  $k_{\text{ET}}$  was set to be 0.01 cm s<sup>-1</sup>, the simulated curve deviated from experimental data. Augmenting  $k_{\text{ET}}$  up to 0.1~0.5 cm s<sup>-1</sup> made the simulated voltammograms changed no more, leading to the best fit in shape.

## References

- 1 E. Laviron, *J. Electroanal. Chem.*, 1983, **146**, 15-36.
- 2 E. Laviron, *J. Electroanal. Chem.*, 1984, **164**, 213-227.
- 3 M. Eigen, *Discuss. Faraday Soc.*, 1965, 7-15.
